# Development and validation of the Japanese version of the Lesbian, Gay, Bisexual, and Transgender Development of Clinical Skills Scale

Yusuke Kanakubo<sup>1,2,3\*</sup>, Yoshifumi Sugiyama<sup>1,4</sup>, Eriko Yoshida<sup>1,3,5</sup>, Takuya Aoki<sup>1</sup>, Rieko Mutai<sup>6</sup>, Masato Matsushima<sup>1</sup>, Tadao Okada<sup>2</sup>

<sup>1</sup> Division of Clinical Epidemiology, Research Center for Medical Sciences, The Jikei University School of Medicine, Minato-ku, Tokyo, Japan

<sup>2</sup> Kameda Family Clinic Tateyama, Tateyama, Chiba, Japan

<sup>3</sup> Nijjiro Doctors, Minato-ku, Tokyo, Japan

<sup>4</sup> Division of Community Health and Primary Care, Center for Medical Education, The Jikei University School of Medicine, Minato-ku, Tokyo, Japan

<sup>5</sup> Department of General Internal Medicine, Kawasaki Kyodo Hospital, Kawasaki Health Cooperative Association, Kawasaki, Kanagawa, Japan

<sup>6</sup> Department of Adult Nursing, The Jikei University School of Nursing, Chofu, Tokyo, Japan

\*Corresponding author

E-mail: [kanakubo.research@gmail.com](mailto:kanakubo.research@gmail.com) (YK)

## 23 **Abstract**

### 24 **Introduction**

25 The Lesbian, Gay, Bisexual, and Transgender Development of Clinical Skills Scale  
26 (LGBT-DOCSS) is a validated self-assessment tool for health and mental health  
27 professionals who provide care for sexual and gender minority patients. This study  
28 aimed to develop and validate a Japanese version of LGBT-DOCSS  
29 (LGBT-DOCSS-JP) and examine its psychometric properties.

### 30 **Methods**

31 LGBT-DOCSS was translated into Japanese and cross-culturally validated using  
32 cognitive debriefing. We then evaluated the structural validity, convergent and  
33 discriminant validity, internal consistency, and test–retest reliability of  
34 LGBT-DOCSS-JP using an online survey.

### 35 **Results**

36 Data were analyzed for 381 health and mental health professionals aged 20 years or  
37 older from three suburban medical institutions. The confirmatory factor analysis  
38 indicated that the original three-factor model did not fit well with LGBT-DOCSS-JP.  
39 Exploratory factor analysis revealed four new factors: Attitudinal Awareness, Basic  
40 Knowledge, Clinical Preparedness, and Clinical Training. Convergent and discriminant  
41 validity were supported using four established scales that measured attitudes toward  
42 lesbians and gay men, genderism and transphobia, authoritarianism and  
43 conventionalism, and social desirability. The internal consistency of LGBT-DOCSS-JP  
44 was supported by the Cronbach’s alpha values for the overall scale (0.84), as well for  
45 each of its subscales (Attitudinal Awareness and Basic Knowledge both 0.87, Clinical  
46 Preparedness 0.78, and Clinical Training 0.97). The test–retest reliability for the overall  
47 LGBT-DOCSS-JP was supported by an intraclass correlation coefficient score of 0.86.

### 48 **Conclusions**

49 LGBT-DOCSS-JP has the potential to serve as a valuable tool in the development and  
50 assessment of effective curricula for LGBT care education, as well as a means to  
51 promote self-reflection among trainees and professionals.

52

## Introduction

Sexual and gender minorities including lesbian, gay, bisexual, and transgender (LGBT) people have been reported to experience health and healthcare disparities [1]. *Healthy People 2020*, the USA government objectives for improving health over the next decade, committed to eliminating LGBT health disparities [2]. It also emphasized the importance of enhancing efforts to improve LGBT health including providing medical students with training to increase the provision of culturally competent care [2]. Appropriate education and competency assessment are key to improving care for LGBT people. A systematic review has shown that education improves the knowledge and attitudes of medical staff and students toward LGBT patients [3].

The Lesbian, Gay, Bisexual, and Transgender Development of Clinical Skills Scale (LGBT-DOCSS), developed by Bidell in 2017, is an important instrument for enhancing healthcare provided to sexual and gender minorities. This scale assesses the knowledge, attitudes, and skills of healthcare and mental healthcare professionals towards caring for LGBT patients [4]. The scale was created to develop competent clinical services for LGBT people, and improve on the shortcomings of the previous scales [4]. LGBT-DOCSS has been used in recent studies to show that sufficient education and experience improves medical students' clinical skills [5] and to develop guidelines and recommendations for the care of sexual and gender minorities [6].

In Japan, however, the provision of education on the care of sexual and gender minorities is inadequate. The 2016 revision of the model core curriculum for medical education emphasized for the first time the importance of explaining sexual orientation and gender identity as a core competency [7]. However, a recent survey showed that Japanese medical schools allocated only a limited amount of time to educate students about LGBT care [8]. There are also no guidelines on how to teach this content in medical education. One major obstacle is the lack of a suitable competence evaluation scale. To improve the capacity of medical students and staff and overcome the health disparities among sexual and gender minorities in Japan, it is essential to develop a Japanese tool for evaluating the clinical skills required to provide LGBT care.

We therefore aimed to develop a Japanese version of LGBT-DOCSS (LGBT-DOCSS-JP) and examine the scale's reliability and validity among healthcare and mental healthcare professionals in Japan.

88

## 89 **Methods**

90 This study took place in two phases. The first was translation of LGBT-DOCSS into  
 91 Japanese, with cross-cultural adaptation in line with guidelines from the International  
 92 Society for Pharmacoeconomics and Outcomes Research Task Force for Translation  
 93 (ISPOR) [9]. The second was evaluation of reliability and validity of LGBT-DOCSS-JP  
 94 using an online survey. We recruited healthcare and mental healthcare professionals  
 95 from Kameda General Hospital (tertiary teaching hospital), Kameda Clinic  
 96 (multispecialty outpatient clinic), and Kameda Family Clinic Tateyama (family  
 97 medicine clinic) as research participants. All these locations are in suburban areas  
 98 within a 10 km radius of Chiba, Japan. Ethical approval was obtained from the Ethics  
 99 Committees of both The Jikei University School of Medicine (approval numbers:  
 100 33-364(10988) and 34-134(11285)) and Kameda Medical Center (approval numbers:  
 101 21-012 and 22-019).

102

## 103 **First phase: development of LGBT-DOCSS-JP**

104 We developed LGBT-DOCSS-JP in line with ISPOR guidelines [9]. With the  
 105 original author's permission, three authors (YK, EY, YS), all of whom were native  
 106 Japanese speakers and two of whom were familiar with sexual and gender minorities  
 107 issues, translated the original LGBT-DOCSS into Japanese. All the authors discussed  
 108 cross-cultural adaptation and made a provisional version. Next, an English-Japanese  
 109 bilingual physician, who had sufficient experience in back-translation and was not  
 110 familiar with LGBT-DOCSS, back-translated the provisional version into English. The  
 111 original author reviewed the back-translated version and checked the discrepancies.  
 112 After completing a prototype version, we recruited participants via personal connections  
 113 by purposive sampling to conduct a cognitive debriefing. In recruiting participants, we  
 114 considered age, sexual orientation, gender identity, occupation, and years of  
 115 professional experience to ensure maximum variation. Five to eight participants were  
 116 required [9]. Written informed consent was obtained from all participants. The primary  
 117 investigator (YK) asked the participants to fill out the prototype version questionnaire  
 118 and conducted face-to-face interviews individually using an interview guide to check  
 119 interpretation, understandability, cultural adaptation, and alternative wording to make  
 120 the scale better. All interviews were recorded and transcribed. Interviews were  
 121 conducted between January 28<sup>th</sup> and March 9<sup>th</sup>, 2022. All the authors discussed the

122 results, and revised the prototype version before it was reviewed again by the original  
123 author, and a final version of LGBT-DOCSS-JP developed. Content validity and  
124 cross-cultural validity were verified through these processes.

125

## 126 **Second phase: evaluation of reliability and validity of**

## 127 **LGBT-DOCSS-JP**

### 128 **Study design and data collection**

129 We conducted an online survey among health and mental health professionals aged  
130 20 years or older including physicians (including dentists), nurses, pharmacists, and  
131 psychologists affiliated with the study facilities. Two types of mass emails containing a  
132 link to self-administered questionnaires were sent separately to all participants. The  
133 second set were used to examine the test–retest reliability. We asked participants to  
134 complete the two questionnaires voluntarily at intervals of two to four weeks. Before  
135 participation, participants were provided with study information and required to indicate  
136 their willingness to participate by opting in. The first survey was administered on July  
137 11<sup>th</sup>, 2022. Participants were asked to provide demographic information, and complete  
138 LGBT-DOCSS-JP and four additional scales (see “Measures” section) to examine  
139 structural validity, hypothesis testing, and internal consistency. We also included a  
140 Directed Question Scale (“Check option 6 here”), which is commonly used to detect  
141 “satisficing” or answering behaviors in which participants do not devote appropriate  
142 attentional resources to the survey [10]. The second survey was administered on July  
143 28<sup>th</sup>, 2022, and aimed to evaluate the test–retest reliability of LGBT-DOCSS-JP. Both  
144 surveys were anonymous, but participants were asked to set a password at the first  
145 survey and enter the same password at the second survey to enable us to connect their  
146 responses. Those who responded incorrectly to the Directed Question Scale in the first  
147 survey or entered invalid passwords in the second survey were excluded from the  
148 analysis. Respondents got no reward. Reminder emails were sent twice per survey to  
149 mitigate selection bias. The questionnaires were designed using the required-response  
150 function to ensure no item response omissions except items related to participants’  
151 sexuality such as sex assigned at birth, gender identity, and sexual orientation. The data  
152 were collected between July 11<sup>th</sup> and August 31<sup>st</sup>, 2022.

153

## 154 Measures

### 155 Participants' characteristics

156 The demographic questionnaire asked about age groups, sex assigned at birth, gender  
157 identity, sexual orientation, and professional healthcare specialization. It also asked  
158 whether respondents were aware of any coworkers who identified as homosexual or  
159 transgender/transsexual, in both their present and previous workplaces (referred to as  
160 "homosexual coworker" or "trans coworker"), and whether they had close friends,  
161 relatives, or family members who identified as homosexual or transgender/transsexual  
162 (referred to as "homosexual friends/family" or "trans friends/family") using a four-point  
163 Likert-type scale (*yes, probably, probably not, or no*) [11]. There is a lack of consensus  
164 about the appropriate method for inquiring about sexual orientation and gender identity  
165 in Japan, so we used a validated approach from a previous population-based study [12].  
166

### 167 LGBT-DOCSS-JP

168 The original LGBT-DOCSS consists of 18 items across three factors: "Basic  
169 Knowledge" (four items: 1, 2, 6, and 8), "Attitudinal Awareness" (seven items: 3, 5, 7,  
170 9, 12, 17, and 18), and "Clinical Preparedness" (seven items: 4, 10, 11, 13, 14, 15, and  
171 16). Each item was rated on a seven-point Likert-type scale using the anchors *strongly*  
172 *disagree* to *strongly agree* (1 = *strongly disagree*, 4 = *somewhat agree/disagree*, 7 =  
173 *strongly agree*). Eight of the 18 were inverted items: 3, 4, 5, 7, 9, 12, 17, and 18. A  
174 reverse-scoring Likert-type scale was used for the inverted items (i.e., seven points were  
175 given for choice 1). The total mean score was determined by adding all test items and  
176 dividing the result by 18. The mean subscale scores were calculated by summing the  
177 scores of the corresponding questions and dividing the sum by the number of questions  
178 in each subscale. The total mean score and the mean subscale scores are therefore  
179 standardized on a scale of 1 to 7 points, with a higher score meaning greater care  
180 competency.  
181

### 182 The Japanese 6-item revised version of the Attitudes Toward Lesbians 183 and Gay Men Scale (ATLG-J6R)

184 ATLG-J6R is a six-item instrument designed to evaluate the degree of condemnation  
185 or tolerance held by heterosexual laypeople toward lesbian and gay populations [13].  
186 ATLG-J6R uses a seven-point Likert-type scale and has two subscales: "Attitudes  
187 toward Lesbians" and "Attitudes toward Gay Men". It has adequate reliability and

validity among cisgender-heterosexual college students in Japan [13]. We used all six items of ATLG-J6R. A higher score indicates a worse attitude.

### **The Japanese Version of the Genderism and Transphobia Scale-Revised Short Form (J-GTS-R-SF)**

The Japanese version of the Genderism and Transphobia Scale-Revised (J-GTS-R) is a 22-item instrument to measure the prejudicial attitudes of laypeople toward transgender individuals [14]. Adequate reliability and structural validity have been demonstrated among college students in Japan [14]. J-GTS-R-SF is the abbreviated version of J-GTS-R and contains 13 items. It uses a seven-point Likert-type scale [14]. Both scales have the same two factors: “Genderism and Transphobia”, and “Gender Bashing”. We used all seven items of the “Genderism and Transphobia” subscale of J-GTS-R-SF. A higher score shows a higher level of genderism and transphobia.

### **Japanese versions of the Right-Wing Authoritarianism scale (J-RWA)**

J-RWA is a 30-item instrument with two factors (“Authoritarianism” and “Conventionalism”) and a method factor [15]. It has adequate reliability and validity among survey panel members in Japan [15]. We selected five items focusing on sexual morality, homosexuality, sexual preference, gays and lesbians, and premarital sexual intercourse, in line with a previous study [4]. J-RWA uses a nine-point Likert-type scale, ranging from −4 = very strongly disagree to 4 = very strongly agree, but we used the seven-point Likert-type scale from the LGBT-DOCSS-JP (1 = strongly disagree to 7 = strongly agree) to minimize participants’ fatigue with multiple scale changes. A higher score indicates a higher level of authoritarianism and conventionalism.

### **The Japanese version of Balanced Inventory of Desirable Responding (J-BIDR).**

J-BIDR is a 24-item instrument that quantifies social desirability, and contains two distinct factors: “Self-Deceptive Enhancement” and “Impression Management” [16]. Its reliability and validity have been rigorously examined among a sample of college students in Japan, using a seven-point Likert-type scale [16]. The “Self-Deceptive Enhancement” factor assesses the extent to which respondents truthfully depict themselves as socially desirable, and the “Impression Management” factor evaluates the degree to which respondents misrepresent themselves to manipulate their self-presentation. Certain items within the LGBT-DOCSS-JP contain socially undesirable or negative expressions towards LGBT individuals, which may result in a



bias toward positive responses. To investigate the correlation between the LGBT-DOCSS-JP and social desirability, all 24 items of the J-BIDR were included in the study. A higher score shows a greater inclination toward socially desirable responding.

## Sample size

The COnsensus-based Standards for the selection of health Measurement INstruments (COSMIN) guidelines suggest that studies on the development of patient-reported outcome measures should include a minimum of 100 participants [17]. The optimal subjects-to-variables ratio for exploratory factor analysis ranges from 3:1 to 20:1 [18]. LGBT-DOCSS contains 18 items, and it was therefore decided to include a minimum of 360 participants to ensure robust results.

## Statistical analysis

Descriptive statistics of participants' characteristics were generated for the study population. We also examined the psychometric properties of the questionnaires against the COSMIN guideline [17].

## Structural validity

We carried out a confirmatory factor analysis with maximum likelihood estimation to assess the structural validity of the original three-factor model (Attitudinal Awareness, Basic Knowledge, and Clinical Preparedness) [4]. We used several criteria to evaluate the fit of the model, including the comparative fit index (CFI), Tucker–Lewis index (TLI), root mean square error of approximation (RMSEA), and standardized root mean square residual (SRMR). Generally, values close to 0.95 or higher for CFI and TLI, less than 0.06 for RMSEA, and less than 0.08 for SRMR are considered to indicate a good model fit [19]. The model fit was inadequate, and we therefore carried out an exploratory factor analysis using promax rotation with maximum likelihood estimation to ascertain the structure of LGBT-DOCSS-JP. The determination of the number of factors to retain was based on Cattell's scree test [20]. Only items with a factor loading exceeding 0.30 were incorporated.

## Hypothesis testing



We compared LGBT-DOCSS-JP with the other outcome measurement instruments to evaluate convergent and discriminant validity. Convergent validity was assessed by examining Spearman's rank correlation coefficients between the scores on LGBT-DOCSS-JP, including its overall score and subscales, and the scores on ATLG-J6R, J-GTS-R-SF, and J-RWA. Previous studies suggested that the LGBT-DOCSS-JP Attitudinal Awareness subscale would have the strongest correlation with ATLG-J6R, J-GTS-R-SF, and J-RWA. Conversely, to support discriminant validity, we hypothesized that the scores on LGBT-DOCSS-JP would demonstrate minimal correlation with J-BIDR. Certain overarching principles may be used when interpreting correlation coefficients of varying magnitude. For example, a coefficient of 0.10 is deemed small, a coefficient of 0.30 is considered medium, and a coefficient of 0.50 is deemed large [21]. Convergent validity is often considered adequate when the correlation with a measure evaluating the same construct exceeds 0.50 [22].

We also compared the scores of LGBT-DOCSS-JP among subgroups. Several studies have reported a correlation between being relatively young and affirmative attitudes toward LGBT individuals [11, 23]. We hypothesized that scores on the LGBT-DOCSS-JP scale would be higher among younger than older adults. To test this hypothesis, we used Jonckheere–Terpstra tests to compare scores among the five age groups.

Previous studies have shown that participants identifying as LGBT show significantly higher scores on the LGBT-DOCSS scale [4]. We hypothesized that scores would be higher among individuals classified as sexual and gender minorities compared to cisgender-heterosexual participants. To test this hypothesis, we used a Wilcoxon rank sum test to compare scores between cisgender-heterosexual participants and individuals classified as “sexual and gender minorities (LGBTQA)”, which includes lesbian, gay, bisexual, transgender, queer/questioning (including those who have not decided their sexualities), and asexual. Data from individuals who were missing responses to the questions on sexuality or who did not understand the question were excluded from this analysis.

Some studies of intergroup contact theory have reported that contact with members of stigmatized groups can reduce prejudice and improve attitudes towards those groups. In particular, heterosexual individuals who report personal acquaintance with gay men or lesbians show significantly more favorable attitudes toward the gay community than

those who do not have this contact [24, 25]. We therefore also hypothesized that participants who know more about sexual and gender minorities would have higher scores than those who are less aware. To test these hypotheses among cisgender-heterosexual participants, we used Jonckheere–Terpstra tests to compare scores among the four levels of awareness of individuals who identify as homosexual or transgender/transsexual in current and previous workplaces and among close friends, relatives, or family members.

### **Internal consistency**

Cronbach’s  $\alpha$  was calculated to assess internal consistency of total and subscale scores. A score of 0.70–0.95 is considered an acceptable range [26].

### **Test–retest reliability**

The temporal stability of the measure was evaluated by assessing its two-to-four week test–retest reliability using the intraclass correlation coefficient (ICC (2,1)). Values less than 0.5, between 0.5 and 0.75, between 0.75 and 0.9, and greater than 0.90 are indicative of poor, moderate, good, and excellent reliability [27]. Responses were determined to be from the same respondent when the passwords matched.

### **Responsiveness and interpretability**

Responsiveness and interpretability of scores were not assessed.

All statistical analyses used R, version 4.2.1 (the R Foundation). For each analysis, we used a two-tailed significance level of  $P < 0.05$ . Missing values were limited to three items: sex assigned at birth, gender identity, and sexual orientations. We used listwise deletion for comparative analysis between LGBTQA and cisgender-heterosexual participants, and among cisgender-heterosexual individuals with varying levels of awareness about sexual and gender minorities. Missing values did not affect other analyses in which sexuality was not taken into account.

## **Results**

### **First phase: development of LGBT-DOCSS-JP**

In the first phase, we recruited eight participants, including three physicians (a family physician, a pediatrician, and a urologist), three nurses, a pharmacist, and a psychologist.

The participants' ages ranged from 27 to 54 years (median = 39, interquartile range (IQR) = 30.5–47.5) and years of experience ranged from 3 to 32 (median = 9.5, IQR = 5–21.5). Four participants were cisgender males, and four were cisgender females including one lesbian. No transgender individuals were included. The median interview time (IQR) was 36 (27–38) minutes.

During the translation process, some expressions were adjusted to facilitate cultural adaptation. For example, some terms such as sexual orientation, gender identity, lesbian, gay, bisexual, transgender, cisgender, and the umbrella term LGBT are not widely known in Japan, and annotations were therefore added to provide clarity (S1 Appendix). Some participants mentioned that these annotations were useful.

The participants pointed out wording or expressions that required improvement, and we discussed the modifications later. For instance, most of the participants were not familiar with the concept of “institutional barriers”. We therefore adopted the expression “systematic barriers, such as rules and customs” for semantic equivalence. The expression of choices in the original questionnaire (*strongly disagree–strongly agree*) was considered inadequate because of the variance in natural Japanese response patterns contingent on the item type. We therefore modified the expression of choices for some items inquiring about knowledge or experience (i.e., *not at all–very well* or *none–very much*) until we had a final version of LGBT-DOCSS-JP (S1 Appendix). Content validity and cross-cultural validity were established through these processes.

## **Second phase: evaluation of reliability and validity of LGBT-DOCSS-JP**

A total of 414 (22.3%) out of 1855 participants responded to the first questionnaire (Fig 1). However, 33 of these responses were deemed incorrect from the Directed Question Scale [10], resulting in a total of 381 (20.5%) responses available for analysis. We obtained 89 (14.2%) suitable responses from physicians/dentists, 252 (22.6%) from nurses, 34 (31.8%) from pharmacists, and six (100%) from licensed or certified clinical psychologists. In total, 151 (36.5%) of the 414 participants responded to the second questionnaire. However, 51 of these responses were excluded because of incorrect responses to the Directed Question Scale or password mismatch, giving a total of 100 responses for analysis.

359

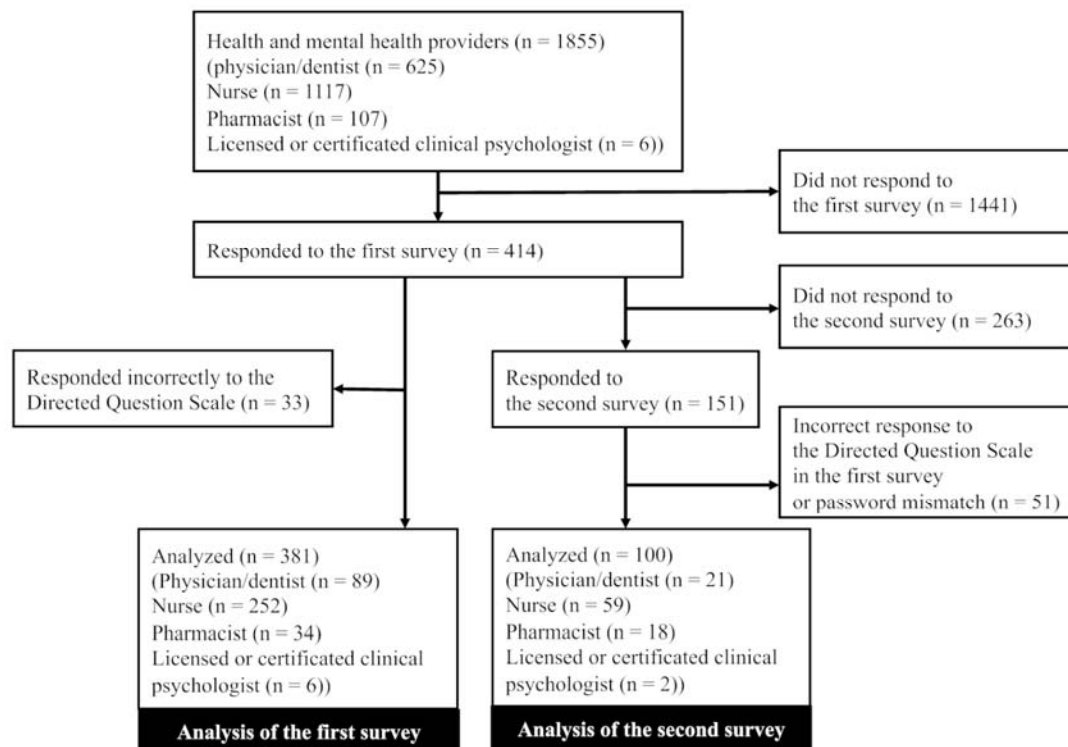

360

361 **Fig 1. Flow diagram of the study**

362

363 Table 1 shows the baseline characteristics of participants. Overall, 47.5% of the  
 364 sample were in their 20s, 69.6% identified as cisgender females, and 78.2% identified as  
 365 heterosexual. The majority of participants (66.1%) were nurses. The mean (standard  
 366 deviation (SD)) LGBT-DOCSS-JP total score was 4.16 (0.74) and the median (IQR)  
 367 score was 4.11 (3.67–4.72).

368

**Table 1. Participants' characteristics**

|                                                 | First survey<br>(n = 381) | Second survey<br>(n = 100) |
|-------------------------------------------------|---------------------------|----------------------------|
| Age (years), no. (%)                            |                           |                            |
| 20–29                                           | 181 (47.5)                | 35 (35.0)                  |
| 30–39                                           | 98 (25.7)                 | 34 (34.0)                  |
| 40–49                                           | 61 (16)                   | 21 (21.0)                  |
| 50–59                                           | 31 (8.1)                  | 7 (7.0)                    |
| ≥ 60                                            | 10 (2.6)                  | 3 (3.0)                    |
| Sex assigned at birth, no. (%)                  |                           |                            |
| Male                                            | 108 (28.3)                | 34 (34.0)                  |
| Female                                          | 270 (70.9)                | 65 (65.0)                  |
| Missing                                         | 3 (0.8)                   | 1 (1.0)                    |
| Gender identity, no. (%)                        |                           |                            |
| Cisgender male                                  | 106 (27.8)                | 32 (32.0)                  |
| Cisgender female                                | 265 (69.6)                | 63 (63.0)                  |
| Transgender                                     | 7 (1.8)                   | 4 (4.0)                    |
| Missing                                         | 3 (0.8)                   | 1 (1.0)                    |
| Sexual orientation, no. (%)                     |                           |                            |
| Heterosexual                                    | 298 (78.2)                | 74 (74.0)                  |
| Lesbian/gay                                     | 4 (1)                     | 2 (2.0)                    |
| Bisexual                                        | 11 (2.9)                  | 3 (3.0)                    |
| Asexual                                         | 8 (2.1)                   | 3 (3.0)                    |
| Do not want to decide/have not decided          | 34 (8.9)                  | 11 (11.0)                  |
| Do not understand the question                  | 8 (2.1)                   | 1 (1.0)                    |
| Other                                           | 3 (0.8)                   | 2 (2.0)                    |
| Missing                                         | 15 (3.9)                  | 4 (4.0)                    |
| Professional healthcare specialization, no. (%) |                           |                            |
| Physician (including dentist)                   | 89 (23.4)                 | 21 (21.0)                  |
| Nurse                                           | 252 (66.1)                | 59 (59.0)                  |
| Pharmacist                                      | 34 (8.9)                  | 18 (18.0)                  |
| Licensed or certified clinical psychologist     | 6 (1.6)                   | 2 (2.0)                    |

369

370 **Structural validity**

371 A confirmatory factor analysis using the model described in the original paper [4]  
 372 showed the following indices of model fit: CFI = 0.718, TLI = 0.673, RMSEA = 0.158  
 373 [90% confidence interval (CI) 0.151–0.166], and SRMR = 0.095. The model fit was  
 374 therefore deemed insufficient, and we carried out an exploratory factor analysis. The  
 375 scree test suggested a four- or five-factor model. A five-factor model was rejected  
 376 because it included items with low factor loading ( $< 0.30$ ). However, the four-factor  
 377 model was deemed interpretable, and all factor loadings exceeded 0.30. The factors  
 378 were named “Attitudinal Awareness” (items 3, 5, 7, 9, 12, 17, and 18), “Basic  
 379 Knowledge” (items 1, 2, 6, and 8), “Clinical Preparedness” (items 4, 13, 14, 15, and 16),  
 380 and “Clinical Training” (items 10 and 11). Table 2 shows structure coefficients. The  
 381 score distributions for the overall scale and each subscale are shown in S1 Fig.

382

**Table 2. Structure coefficients for LGBT-DOCSS-JP (n = 381)**

| Item                                                                                                                        | Factor       |              |        |        |
|-----------------------------------------------------------------------------------------------------------------------------|--------------|--------------|--------|--------|
|                                                                                                                             | 1            | 2            | 3      | 4      |
| *9 When it comes to transgender individuals, I believe they are morally deviant.                                            | <b>0.829</b> | -0.042       | -0.086 | 0.018  |
| *17 People who dress opposite to their biological sex have a perversion.                                                    | <b>0.808</b> | 0.083        | -0.056 | -0.049 |
| *12 The lifestyle of a LGB individual is unnatural or immoral.                                                              | <b>0.796</b> | 0.010        | -0.071 | 0.032  |
| *18 I would be morally uncomfortable working with a LGBT client/patient.                                                    | <b>0.713</b> | -0.001       | -0.020 | 0.035  |
| *3 I think being transgender is a mental disorder.                                                                          | <b>0.665</b> | -0.039       | 0.030  | 0.008  |
| *7 LGB individuals must be discreet about their sexual orientation around children.                                         | <b>0.555</b> | -0.008       | -0.002 | 0.045  |
| *5 A same sex relationship between two men or two women is not as strong and as committed as one between a man and a woman. | <b>0.510</b> | -0.009       | 0.126  | -0.088 |
| 1 I am aware of institutional barriers that may inhibit transgender people from using health care services.                 | -0.023       | <b>1.053</b> | -0.131 | -0.048 |
| 2 I am aware of institutional barriers that may inhibit LGB people from using health services.                              | -0.014       | <b>1.022</b> | -0.112 | -0.033 |



|                                |                                                                                                                                                                           |        |              |              |              |
|--------------------------------|---------------------------------------------------------------------------------------------------------------------------------------------------------------------------|--------|--------------|--------------|--------------|
| 8                              | I am aware of research indicating that transgender individuals experience disproportionate levels of health and mental health problems compared to cisgender individuals. | 0.003  | <b>0.540</b> | 0.094        | 0.030        |
| 6                              | I am aware of research indicating that LGB individuals experience disproportionate levels of health and mental health problems compared to heterosexual individuals.      | 0.008  | <b>0.461</b> | 0.115        | 0.015        |
| 14                             | I feel competent to assess a person who is LGB in a therapeutic setting.                                                                                                  | 0.024  | -0.025       | <b>1.068</b> | -0.183       |
| 15                             | I feel competent to assess a person who is transgender in a therapeutic setting.                                                                                          | 0.061  | -0.047       | <b>1.044</b> | -0.153       |
| 13                             | I have experience working with LGB clients/patients.                                                                                                                      | -0.069 | 0.003        | <b>0.358</b> | 0.013        |
| 16                             | I have experience working with transgender clients/patients.                                                                                                              | -0.027 | -0.027       | <b>0.346</b> | 0.145        |
| *4                             | I would feel unprepared talking with a LGBT client/patient about issues related to their sexual orientation or gender identity.                                           | 0.087  | 0.066        | <b>0.310</b> | 0.130        |
| 11                             | I have received adequate clinical training and supervision to work with lesbian, gay, and bisexual (LGB) clients/patients.                                                | 0.009  | -0.004       | -0.043       | <b>1.015</b> |
| 10                             | I have received adequate clinical training and supervision to work with transgender clients/patients.                                                                     | -0.010 | -0.025       | -0.020       | <b>0.969</b> |
| Proportion of variance         |                                                                                                                                                                           | 0.19   | 0.14         | 0.13         | 0.10         |
| Cronbach's $\alpha$ (subscale) |                                                                                                                                                                           | 0.87   | 0.87         | 0.78         | 0.97         |

Note. Extraction method: Maximum likelihood estimation. Rotation method: Promax rotation. \*Inverted item. Bold font shows factor loadings greater than 0.3.

## Hypothesis testing

The results of hypothesis testing for convergent and discriminant validity are shown in Table 3. They showed adequate convergent and discriminant validity. The total scores for LGBT-DOCSS-JP showed moderate correlations with ATLG-J6R, J-GTS-R-SF, and J-RWA, indicating adequate convergent validity. The Attitudinal Awareness subscale showed the strongest correlation with the J-GTS-R-SF Genderism/Transphobia subscale ( $r = -0.70$ ), followed by the ATLG-J6R ( $r = -0.63$ ). The weak correlation between LGBT-DOCSS-JP and J-BIDR attests to the strong discriminant validity of LGBT-DOCSS-JP.

**Table 3. Convergent and divergent correlation matrix (n = 381)**

|                                     | Attitudinal<br>Awareness | Basic<br>Knowledge | Clinical<br>Preparedness | Clinical<br>Training | ATLG-<br>J6R | J-GTS-<br>R-SF | J-RWA | J-BIDR |
|-------------------------------------|--------------------------|--------------------|--------------------------|----------------------|--------------|----------------|-------|--------|
| LGBT-DOCSS-JP<br>Total scale scores | 0.54                     | 0.74               | 0.72                     | 0.51                 | -0.47        | -0.50          | -0.40 | 0.18   |
| Attitudinal<br>Awareness            |                          | 0.13               | 0.20                     | 0.06                 | -0.63        | -0.70          | -0.50 | 0.14   |
| Basic Knowledge                     |                          |                    | 0.37                     | 0.34                 | -0.22        | -0.24          | -0.25 | 0.13   |
| Clinical<br>Preparedness            |                          |                    |                          | 0.44                 | -0.20        | -0.22          | -0.16 | 0.12   |
| Clinical Training                   |                          |                    |                          |                      | -0.11        | -0.07          | -0.07 | 0.01   |
| ATLG-J6R                            |                          |                    |                          |                      |              | 0.68           | 0.49  | -0.09  |
| J-GTS-R-SF                          |                          |                    |                          |                      |              |                | 0.52  | -0.18  |
| J-RWA                               |                          |                    |                          |                      |              |                |       | -0.08  |

Note. Attitudinal Awareness, Basic Knowledge, Clinical Preparedness, and Clinical Training are subscales of LGBT-DOCSS-JP. ATLG-J6R = Japanese 6-item revised version of the Attitudes Toward Lesbians and Gay Men Scale; J-GTS-R-SF = items on the Genderism and Transphobia subscale of the Japanese Version of the Genderism and Transphobia Scale-Revised Short Form; J-RWA = items focusing on sexuality from the Japanese version of the Right-Wing Authoritarianism scale; J-BIDR = Japanese version of Balanced Inventory of Desirable Responding.

396

397 Table 4 shows the results of the hypothesis testing. The scores for the Attitudinal  
398 Awareness subscale were significantly higher among younger age groups. However, the  
399 scores for the Clinical Preparedness subscale were higher among older age groups. The  
400 overall scores, and the scores for the Basic Knowledge and Clinical Preparedness  
401 subscales, did not show significant differences. The cisgender-heterosexual participants  
402 had significantly lower scores for the total scale and each subscale compared to  
403 LGBTQA participants. S1 Table shows that cisgender-heterosexual participants who  
404 were aware of homosexual coworkers, transgender/transsexual coworkers, and  
405 transgender/transsexual friends, family, or relatives had significantly higher overall  
406 scores and scores for some subscales. Those who were aware of sexual and gender  
407 minorities also had significantly higher scores on the Clinical Preparedness subscale in  
408 each subgroup analysis.

409

**Table 4. Hypothesis testing (n = 381)**

|                                          | No. | Total<br>(mean (SD)) | Attitudinal<br>Awareness<br>(mean (SD)) | Basic<br>Knowledge<br>(mean (SD)) | Clinical<br>Preparedness<br>(mean (SD)) | Clinical<br>Training<br>(mean (SD)) |
|------------------------------------------|-----|----------------------|-----------------------------------------|-----------------------------------|-----------------------------------------|-------------------------------------|
| Total sample                             | 381 | 4.16 (0.74)          | 6.30 (0.82)                             | 3.85 (1.51)                       | 2.37 (1.14)                             | 1.75 (1.21)                         |
| Age (years)                              |     |                      |                                         |                                   |                                         |                                     |
| 20–29                                    | 181 | 4.13 (0.68)          | 6.37 (0.82)                             | 3.85 (1.44)                       | 2.18 (1.04)                             | 1.73 (1.09)                         |
| 30–39                                    | 98  | 4.23 (0.82)          | 6.39 (0.75)                             | 3.68 (1.77)                       | 2.60 (1.20)                             | 1.87 (1.52)                         |
| 40–49                                    | 61  | 4.06 (0.72)          | 6.14 (0.88)                             | 3.88 (1.37)                       | 2.26 (1.08)                             | 1.58 (1.00)                         |
| 50–59                                    | 31  | 4.18 (0.76)          | 5.97 (0.89)                             | 4.05 (1.27)                       | 2.74 (1.36)                             | 1.78 (1.13)                         |
| 60+                                      | 10  | 4.35 (0.88)          | 6.10 (0.75)                             | 4.50 (1.30)                       | 2.80 (1.26)                             | 1.80 (1.23)                         |
| P value <sup>a)</sup>                    |     | 1                    | <b>&lt; 0.01</b>                        | 0.50                              | <b>0.01</b>                             | 0.56                                |
| Sexual orientation and gender identity   |     |                      |                                         |                                   |                                         |                                     |
| Cisgender-heterosexual                   | 293 | 4.09 (0.70)          | 6.26 (0.85)                             | 3.70 (1.44)                       | 2.30 (1.14)                             | 1.72 (1.23)                         |
| Sexual and gender minorities<br>(LGBTQA) | 62  | 4.49 (0.78)          | 6.51 (0.63)                             | 4.50 (1.58)                       | 2.72 (1.12)                             | 1.85 (1.17)                         |
| P value <sup>b)</sup>                    |     | <b>&lt; 0.01</b>     | <b>&lt; 0.01</b>                        | <b>&lt; 0.01</b>                  | <b>&lt; 0.01</b>                        | <b>&lt; 0.01</b>                    |

Note. LGBT-DOCSS-JP total scale scores and subscale scores are described. a) Jonckheere–Terpstra test.

b) Wilcoxon rank sum test. Bold font shows significance at  $P < 0.05$  in P value line. SD, standard deviation.

410

411

## Internal consistency

In this group, Cronbach's alpha of LGBT-DOCSS-JP total score was 0.84 [95% CI 0.81–0.86]. The Cronbach's alpha for the four factors was 0.87 for both Attitudinal Awareness and Basic Knowledge, 0.78 for Clinical Preparedness, and 0.97 for Clinical Training.

## Test-retest reliability

ICC(2,1) of LGBT-DOCSS-JP total score was 0.86 [95% CI 0.80–0.91]. The values for the four factors were 0.77 for Attitudinal Awareness, 0.80 for Basic Knowledge, 0.71 for Clinical Preparedness, and 0.82 for Clinical Training.

## Discussion

This paper describes the process of developing LGBT-DOCSS-JP through a cross-cultural validation process following a scale translation guideline and examining its psychometric properties. We confirmed the reliability and validity of LGBT-DOCSS-JP.

In terms of structural validity, LGBT-DOCSS-JP has a distinct four-factor structure, covering Attitudinal Awareness, Basic Knowledge, Clinical Preparedness, and Clinical Training. The Attitudinal Awareness and Basic Knowledge subscales include the same items as the original LGBT-DOCSS, but we separated the original scale's Clinical Preparedness subscale into two domains: Clinical Preparedness and Clinical Training. One of the main reasons is the difference in educational systems across nations. Education on LGBT issues is lacking within the USA, but the deficiency is even more conspicuous in Japan. A recent study reported that the proportion of medical schools that did not teach LGBT content at all during clinical training was significantly higher in Japan than in the USA and Canada (47.2% vs 33.3%) [8]. Other recent studies have found that over 90% of hospitals in Japan do not provide nursing training with LGBT content, despite the demand for this education [28, 29]. This is much worse than the 28% of baccalaureate nursing programs in the USA that did not teach LGBT sexual health at all [30]. These training issues in Japan are mainly due to the unavailability of suitable instructors and lack of school policy about LGBT education [8, 30, 31]. However, despite the lack of official practical training, many healthcare professionals are aware of the needs of LGBT patients and provide care for them regularly, increasing their clinical preparedness through trial and error. The discrepancy between the lack of

official education and actual clinical practice may account for the separation of the original Clinical Preparedness factor into two factors in our study. This separation was also supported by comparing the scores with the original study [4]. The mean (SD) scores in our study for the Clinical Preparedness and Clinical Training subscales were 2.37 (1.14) and 1.75 (1.21), notably lower than the Clinical Preparedness score of 3.51 (1.45) reported in the original study [4]. The Basic Knowledge subscale mean (SD) score was also lower in our study than in the original study (3.85 (1.51) vs. 4.95 (1.51)). Providing precise knowledge and on-the-job clinical training with LGBT patients may be effective in the current Japanese context. However, the Attitudinal Awareness subscale score was as high in this study as in the original study (6.30 (0.82) vs. 6.52 (0.72)) [4]. These findings align with the social milieu of Japan, where a succession of same-sex partnership schemes have been instituted at the municipal level since 2015, and the proportion of citizens showing favorable views of LGBT individuals is increasing [11]. A higher score for Attitudinal Awareness is therefore reasonable.

We also conducted some hypothesis testing. As hypothesized, younger people scored better in the Attitudinal Awareness subscale, which is in line with previous research [4, 11]. Older participants scored higher on the Clinical Preparedness subscale, probably because of increased clinical expertise acquired over their years of professional healthcare experience. This is inconsistent with a previous study of healthcare providers in the USA, which reported no significant difference in LGBT-DOCSS scores based on age [32]. As expected, LGBTQA participants scored higher on LGBT-DOCSS-JP than cisgender-heterosexual participants. Cisgender-heterosexual individuals who were aware of homosexual coworkers at their workplace or knew there were homosexual or transgender/transsexual individuals among their friends, relatives, or family scored higher than their peers. These findings are in line with previous studies [24, 25]. However, awareness of transgender/transsexual coworkers was not significantly associated with higher scores except for the Clinical Preparedness subscale. The literature offers inconsistent conclusions about the effectiveness of contact with transgender people in reducing bias. A critical shortcoming is the limited measurement of intergroup contact with transgender people [33]. Previous studies have used a dichotomous measure of contact, disregarding the importance of both quantity and quality of contact [33]. Our study asked solely about participants' perceptions of the presence or absence of transgender/transsexual individuals. Consequently, our measure may have failed to accurately capture the frequency and quality of intergroup contact,



potentially undermining the observed effects of this contact on bias reduction. The restricted number of participants may also explain the lack of statistical power.

Our analyses showed satisfactory validity. LGBT-DOCSS-JP, especially the Attitudinal Awareness subscale, showed a robust association with established scales assessing attitudes toward lesbian and gay individuals, genderism and transphobia, as well as authoritarianism and conventionalism. It was not correlated with a social desirability scale unrelated to the construct of LGBT-DOCSS-JP. These findings show sufficient convergent and discriminant validity of LGBT-DOCSS-JP.

The results also suggest that the scale is reliable. The Cronbach's alpha and ICC(2,1) values of LGBT-DOCSS-JP total score were sufficiently good, and almost the same as those reported in the original study [4]. These findings indicate that LGBT-DOCSS-JP shows robust internal consistency and test-retest reliability.

This study has numerous strengths. First, LGBT-DOCSS-JP is the first Japanese scale to assess health and mental health professionals' clinical skills with LGBT patients. However, this scale was not designed to serve as a high-stakes assessment such as a pass-fail comprehensive degree examination, certification test, or licensing examination [4]. Second, the translation is based on a culturally and academically validated process. Third, we had a sufficiently large sample to evaluate psychometric properties, and the results of hypothesis testing were also conceptually acceptable. Fourth, we used an online survey to guarantee anonymity because of the sensitive nature of the topic. Some participants may not have engaged fully with the survey, but we included a question to detect and mitigate this drawback [10]. Fifth, the study demonstrated the applicability of LGBT-DOCSS in non-English-speaking and non-Western countries and cultures, addressing a limitation of the previous study [4].

However, this study also had some limitations. First, it was conducted exclusively within three suburban medical institutions, imposing constraints on its external validity. Future investigations are needed in diverse clinical settings. Second, there was some self-selection bias. Our respondents included a significantly higher percentage of sexual and gender minorities (LGBTQA) compared to a previous general population study (22.8% vs. 8.2%) [23]. Additionally, approximately four times as many individuals responded "yes" or "probably" about their awareness of sexual and gender minorities than in a previous study [11]. Those who had more awareness of sexual and gender

minorities may have been more inclined to respond. Furthermore, the overall response rate was limited despite our reminder emails. It is therefore conceivable that our scale scores were overestimated when compared with the general population. Third, interpretability and responsiveness were not evaluated, and these psychometric properties should be confirmed in future studies.

LGBT-DOCSS-JP has the potential to help with the development and assessment of effective curricula for education and training in providing care for LGBT people. This is urgently needed in Japan, where effective training programs and methods have yet to be established. LGBT-DOCSS-JP may also be a valuable tool to promote self-reflection among trainees and professionals about their LGBT attitudinal awareness, basic knowledge, clinical preparedness, and clinical training. We hope this scale will primarily be used for self-exploration and competency development.

## Acknowledgments

The authors are grateful to Toshiaki Kameda and Yaeko Watanabe for supporting the data collection. We also thank Daichi Hayashi for the back-translation. We would like to take this opportunity to thank Mamiko Ukai and Ryota Takahashi for their collaboration and advice as Kameda Family Clinic Tateyama primary care research team. We also thank Melissa Leffler, MBA, from Edanz (<https://jp.edanz.com/ac>) for editing a draft of this manuscript.

## References

1. Institute of Medicine. The health of lesbian, gay, bisexual, and transgender people: Building a foundation for better understanding. Washington, DC: National Academies Press; 2011.
2. U.S. Department of Health and Human Services. Lesbian, Gay, Bisexual, and Transgender Health 2020 [cited 11 July 2023]. Available from: <https://wayback.archive-it.org/5774/20220413203148/https://www.healthypeople.gov/2020/topics-objectives/topic/lesbian-gay-bisexual-and-transgender-health>.
3. Sekoni AO, Gale NK, Manga-Atangana B, Bhadhuri A, Jolly K. The effects of educational curricula and training on LGBT-specific health issues for healthcare students and professionals: a mixed-method systematic review. *J Int AIDS Soc*. 2017;20(1):21624. doi: 10.7448/IAS.20.1.21624. PubMed PMID: 28782330; PubMed Central PMCID: PMC5577719.
4. Bidell MP. The Lesbian, Gay, Bisexual, and Transgender Development of Clinical Skills Scale (LGBT-DOCSS): Establishing a New Interdisciplinary Self-Assessment for Health Providers. *J Homosex*. 2017;64(10):1432-60. doi: 10.1080/00918369.2017.1321389. PubMed PMID: 28459378.
5. Nowaskie DZ, Patel AU. How much is needed? Patient exposure and curricular education on medical students' LGBT cultural competency. *BMC Medical Education*. 2020;20(1). doi: 10.1186/s12909-020-02381-1.
6. Willging C, Kano M, Green AE, Sturm R, Sklar M, Davies S, et al. Enhancing primary care services for diverse sexual and gender minority populations: a developmental study protocol. *BMJ Open*. 2020;10(2):e032787. Epub 20200225. doi: 10.1136/bmjopen-2019-032787. PubMed PMID: 32102808; PubMed Central PMCID: PMC7045086.
7. Medical Education Model Core Curriculum Coordination Committee; Medical Education Model Core Curriculum Expert Research Committee. Model Core Curriculum for Medical Education in Japan, AY 2016 Revision 2017 [cited 11 July 2023]. Available from:

566 [https://www.mext.go.jp/component/a\\_menu/education/detail/\\_icsFiles/afieldfile/2018/06/18/1325989\\_3](https://www.mext.go.jp/component/a_menu/education/detail/_icsFiles/afieldfile/2018/06/18/1325989_3)  
567 [0.pdf](#).

568 8. Yoshida E, Matsushima M, Okazaki F. Cross-sectional survey of education on LGBT content  
569 in medical schools in Japan. *BMJ Open*. 2022;12(5):e057573. Epub 20220518. doi:  
570 10.1136/bmjopen-2021-057573. PubMed PMID: 35584939; PubMed Central PMCID:  
571 PMC9119159.

572 9. Wild D, Grove A, Martin M, Eremenco S, McElroy S, Verjee-Lorenz A, et al. Principles of  
573 Good Practice for the Translation and Cultural Adaptation Process for Patient-Reported Outcomes (PRO)  
574 Measures: report of the ISPOR Task Force for Translation and Cultural Adaptation. *Value Health*.  
575 2005;8(2):94-104. doi: 10.1111/j.1524-4733.2005.04054.x. PubMed PMID: 15804318.

576 10. Maniaci MR, Rogge RD. Caring about carelessness: Participant inattention and its effects on  
577 research. *Journal of Research in Personality*. 2014;48:61-83. doi: 10.1016/j.jrp.2013.09.008.

578 11. Kamano S, Ishida H, Kazama T, Hiramori D, Yoshinaka T, Kawaguchi K. Attitudes toward  
579 sexual and gender minorities: handout for the 2019 (2nd) national survey report meeting. (“Seiteki  
580 minority ni tsuite no ishiki: 2019 nen (dai 2 kai) zenkokuchosakai haifushiryo”) 2020 [cited 11 July 2023].  
581 Available from: <http://alpha.shudo-u.ac.jp/~kawaguch/2019chousa.pdf>.

582 12. Hiramori D, Kamano S. Asking about Sexual Orientation and Gender Identity in Social  
583 Surveys in Japan: Findings from the Osaka City Residents’ Survey and Related Preparatory Studies.  
584 *Journal of Population Problems*. 2020;76(4):443-66. doi: 10.31235/osf.io/w9mjn.

585 13. Horikawa Y, Oka T. Development and validation of the Japanese 20-item version of the  
586 Attitudes Toward Lesbians and Gay Men Scale (ATLG-J20). *Research in social psychology*.  
587 2018;34(2):85-93. doi: 10.14966/jssp.1728.

588 14. Mori Y, Yanagawa H, Ishimaru K. Should Transgender Education Be Provided by  
589 Transgenders?: Development of the Japanese Version of the Genderism and Transphobia Scale-Revised  
590 and a Randomized Trial at Women’s Universities. *Bulletin of Centre of Clinical Psychology &*  
591 *Counseling at Ochanomizu University*. 2021;22:13-23.

592 15. Takano R, Taka F, Michio. N. Development of Japanese versions of the Right-Wing  
593 Authoritarianism (RWA) scale. *The Japanese Journal of Psychology*. 2021;91(6):398-408. doi:  
594 10.4992/jjpsy.91.19225.

595 16. Tani I. Development of Japanese Version of Balanced Inventory of Desirable Responding  
596 (BIDR-J). *The Japanese Journal of Personality*. 2008;17(1):18-28. doi: 10.2132/personality.17.18.

597 17. Mokkink LB, Prinsen CA, Patrick DL, Alonso J, Bouter LM, de Vet HC, et al. COSMIN Study  
598 Design checklist for Patient-reported outcome measurement instruments 2019 [cited 11 July 2023].  
599 Available from:  
600 [https://www.cosmin.nl/wp-content/uploads/COSMIN-study-designing-checklist\\_final.pdf](https://www.cosmin.nl/wp-content/uploads/COSMIN-study-designing-checklist_final.pdf).

18. MacCallum RC, Widaman KF, Zhang S, Hong S. Sample size in factor analysis. *Psychological Methods*. 1999;4(1):84-99. doi: 10.1037/1082-989X.4.1.84.
19. Hu L, Bentler PM. Cutoff criteria for fit indexes in covariance structure analysis: Conventional criteria versus new alternatives. *Structural Equation Modeling: A Multidisciplinary Journal*. 1999;6(1):1-55. doi: 10.1080/10705519909540118.
20. Cattell RB. The Scree Test For The Number Of Factors. *Multivariate Behav Res*. 1966;1(2):245-76. doi: 10.1207/s15327906mbr0102\_10. PubMed PMID: 26828106.
21. Cohen J. A power primer. *Psychol Bull*. 1992;112(1):155-9. doi: 10.1037//0033-2909.112.1.155. PubMed PMID: 19565683.
22. Abma IL, Rovers M, van der Wees PJ. Appraising convergent validity of patient-reported outcome measures in systematic reviews: constructing hypotheses and interpreting outcomes. *BMC Res Notes*. 2016;9:226. Epub 20160419. doi: 10.1186/s13104-016-2034-2. PubMed PMID: 27094345; PubMed Central PMCID: PMC4837507.
23. Kamano S, Ishida H, Iwamoto T, Koyama Y, Chitose Y, Hiramori D, et al. "Survey on Diversity of Work and Life, and Coexistence among the Residents of Osaka City": Report Based on Percent Frequency Tables 2019 [cited 11 July 2023]. Available from: [https://osaka-chosa.jp/files/20191108osakachosa\\_report.pdf](https://osaka-chosa.jp/files/20191108osakachosa_report.pdf).
24. Pettigrew TF, Tropp LR. A meta-analytic test of intergroup contact theory. *J Pers Soc Psychol*. 2006;90(5):751-83. doi: 10.1037/0022-3514.90.5.751. PubMed PMID: 16737372.
25. Herek GM, Capitanio JP. "Some of My Best Friends" Intergroup Contact, Concealable Stigma, and Heterosexuals' Attitudes Toward Gay Men and Lesbians. *Personality and Social Psychology Bulletin*. 2016;22(4):412-24. doi: 10.1177/0146167296224007.
26. Bland JM, Altman DG. Statistics notes: Cronbach's alpha. *BMJ*. 1997;314(7080):572-. doi: 10.1136/bmj.314.7080.572.
27. Koo TK, Li MY. A Guideline of Selecting and Reporting Intraclass Correlation Coefficients for Reliability Research. *J Chiropr Med*. 2016;15(2):155-63. Epub 20160331. doi: 10.1016/j.jcm.2016.02.012. PubMed PMID: 27330520; PubMed Central PMCID: PMC4913118.
28. Kanda K, Nakashoji I, Yamazaki A, Okada Y, Kano K, Goto M, et al. A Survey of Nurses' Consciousness Concerning Sexual Minorities. *Journal of Japan Society of Nursing Research*. 2022;45(1):93-104. doi: 10.15065/jjsnr.20210908146.
29. Sambe M. Report on "Questionnaire for nursing directors on LGBT patient care." ("LGBT no kanja taiou ni tsuite no kangobucho ankeeto' houkokusho") 2019 [cited 11 July 2023]. Available from: [https://researchmap.jp/multidatabases/multidatabase\\_contents/download/259573/22c639ed26cf64e8c59db15983d58854/20506?col\\_no=2&frame\\_id=498252](https://researchmap.jp/multidatabases/multidatabase_contents/download/259573/22c639ed26cf64e8c59db15983d58854/20506?col_no=2&frame_id=498252).
30. Aaberg V. The state of sexuality education in baccalaureate nursing programs. *Nurse Educ Today*. 2016;44:14-9. Epub 20160521. doi: 10.1016/j.nedt.2016.05.009. PubMed PMID: 27429324.

31. Yamazaki Y, Aoki A, Otaki J. Prevalence and curriculum of sexual and gender minority education in Japanese medical school and future direction. Med Educ Online. 2020;25(1):1710895. doi: 10.1080/10872981.2019.1710895. PubMed PMID: 31931679; PubMed Central PMCID: PMC7006669.
32. Nowaskie DZ, Sewell DD. Assessing the LGBT cultural competency of dementia care providers. Alzheimer's & Dementia: Translational Research & Clinical Interventions. 2021;7(1). doi: 10.1002/trc2.12137.
33. Hoffarth MR, Hodson G. When intergroup contact is uncommon and bias is strong: the case of anti-transgender bias. Psychology & Sexuality. 2018;9(3):237-50. doi: 10.1080/19419899.2018.1470107.

## Supporting information

- S1 Appendix (LGBT-DOCSS-JP). The Japanese version of the Lesbian, Gay, Bisexual, and Transgender Development of Clinical Skills Scale (LGBT-DOCSS-JP) (PDF)** (Any information presented in a language other than English is not published on medRxiv. S1 Appendix is in Japanese, and thus, it is not available here. If you need this file, please contact the corresponding author.)
- S1 Fig. The score distributions for the overall scale and each subscale (PDF)**
- S1 Table. Hypothesis testing among cisgender-heterosexual participants (PDF)**
