# Supplementary material for: Development and validation of the Japanese version of the Lesbian, Gay, Bisexual, and Transgender Development of Clinical Skills Scale
Source: bioRxiv or medRxiv preprint supplement (doi:10.1101/2023.09.26.23296058), 2023-09-26
Supplement: Supplementary file [file media-1.pdf]

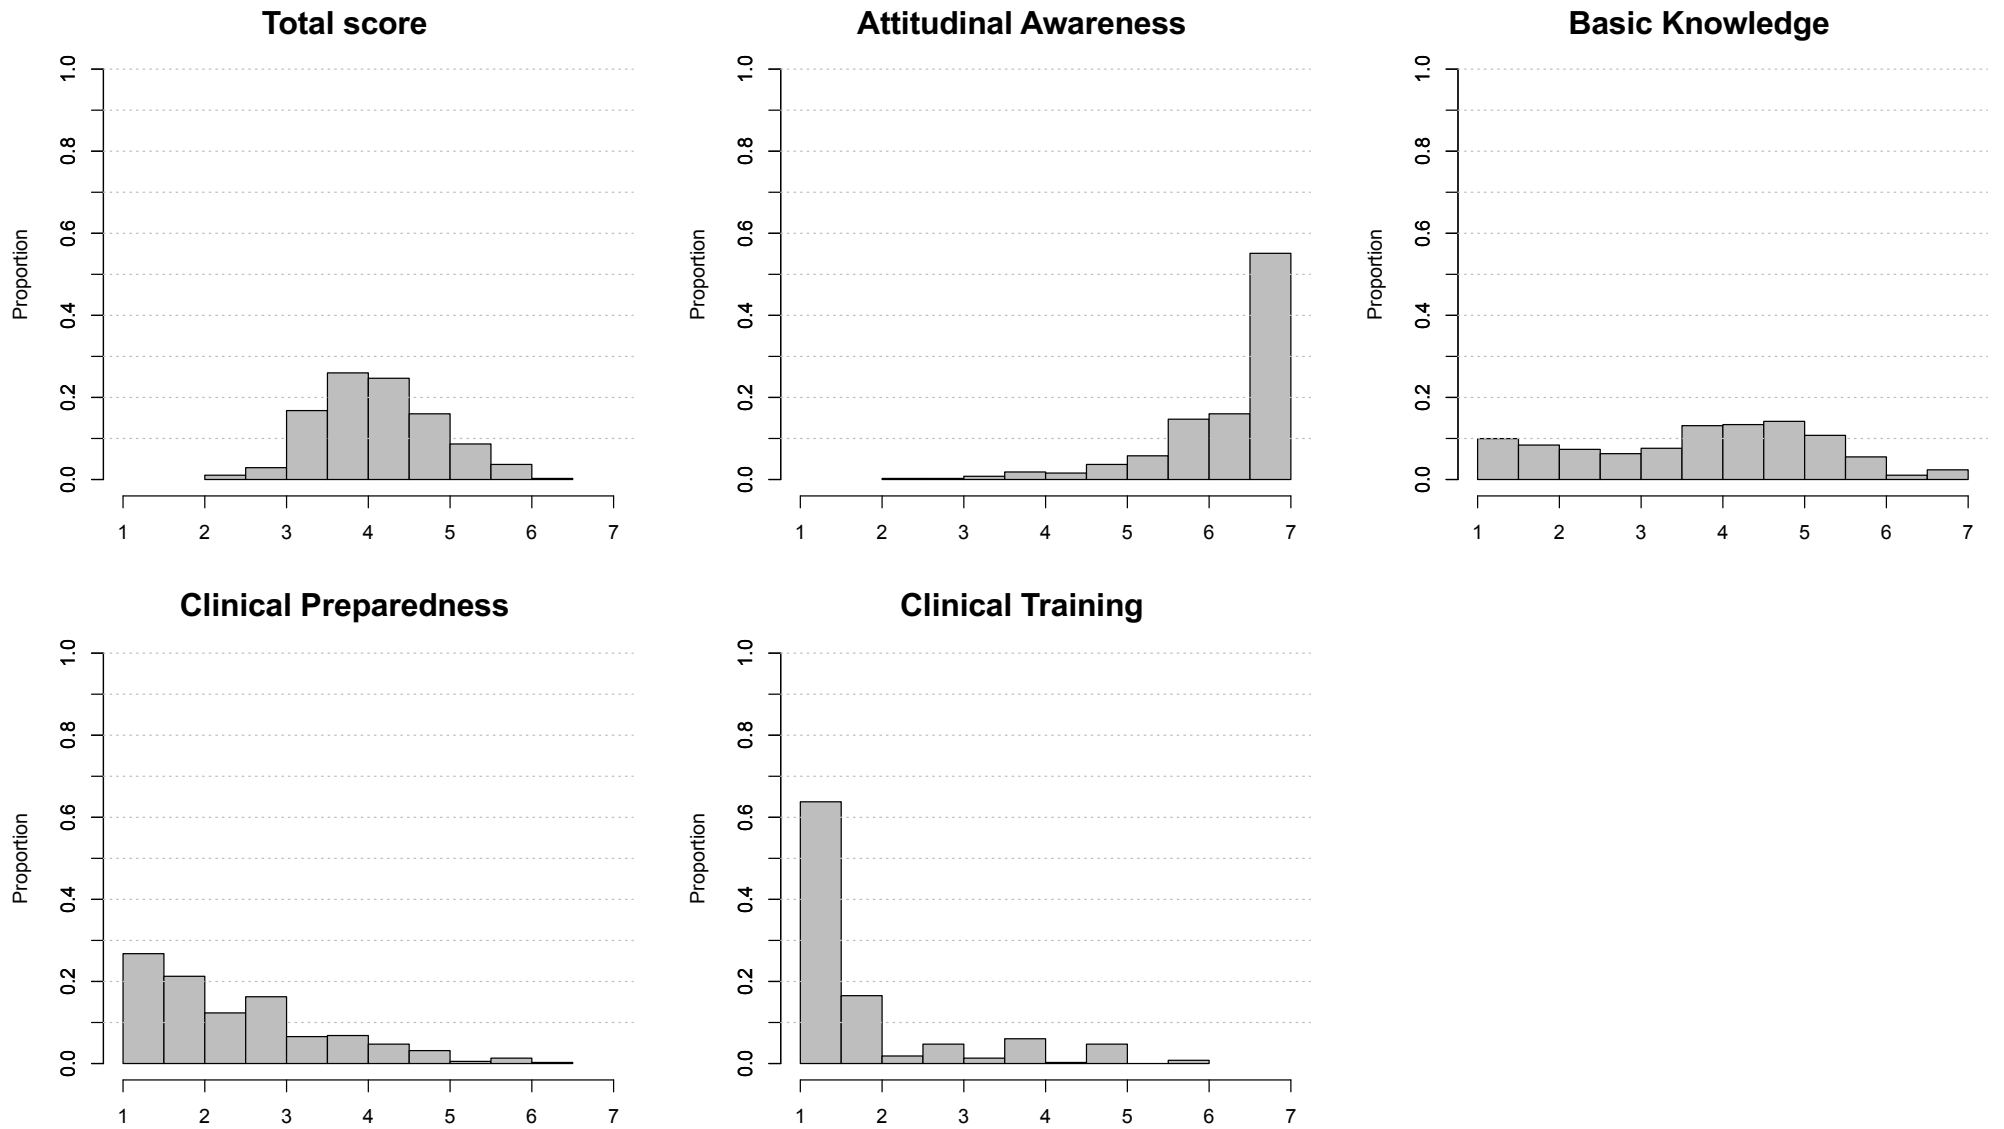

**S1 Fig. The score distributions for the overall and each subscale**
