# Supplementary material for: Development and validation of the Japanese version of the Lesbian, Gay, Bisexual, and Transgender Development of Clinical Skills Scale
Source: bioRxiv or medRxiv preprint supplement (doi:10.1101/2023.09.26.23296058), 2023-09-26
Supplement: Supplementary file [file media-2.pdf]

**S1 Table. Hypothesis testing among cisgender-heterosexual participants (n = 293)**

|                                  | No. | Total<br>(mean (SD)) | Attitudinal<br>Awareness<br>(mean (SD)) | Basic<br>Knowledge<br>(mean (SD)) | Clinical<br>Preparedness<br>(mean (SD)) | Clinical<br>Training<br>(mean (SD)) |
|----------------------------------|-----|----------------------|-----------------------------------------|-----------------------------------|-----------------------------------------|-------------------------------------|
| <b>Homosexual friends/family</b> |     |                      |                                         |                                   |                                         |                                     |
| Yes                              | 41  | 4.31 (0.81)          | 6.45 (0.97)                             | 3.78 (1.56)                       | 2.71 (1.38)                             | 1.93 (1.45)                         |
| Probably                         | 14  | 4.33 (0.57)          | 6.44 (0.42)                             | 4.71 (1.29)                       | 2.19 (1.02)                             | 1.57 (1.00)                         |
| Probably not                     | 135 | 4.10 (0.72)          | 6.28 (0.81)                             | 3.66 (1.51)                       | 2.33 (1.15)                             | 1.81 (1.30)                         |
| No                               | 103 | 3.95 (0.62)          | 6.15 (0.89)                             | 3.59 (1.28)                       | 2.11 (0.99)                             | 1.55 (1.04)                         |
| P value                          |     | <b>&lt; 0.01</b>     | <b>&lt; 0.01</b>                        | 0.09                              | <b>0.04</b>                             | 0.11                                |
| <b>Homosexual coworker</b>       |     |                      |                                         |                                   |                                         |                                     |
| Yes                              | 74  | 4.45 (0.78)          | 6.43 (0.8)                              | 4.07 (1.57)                       | 2.89 (1.31)                             | 2.23 (1.60)                         |
| Probably                         | 72  | 4.11 (0.69)          | 6.28 (0.91)                             | 3.73 (1.39)                       | 2.38 (1.10)                             | 1.58 (1.08)                         |
| Probably not                     | 120 | 3.87 (0.61)          | 6.13 (0.87)                             | 3.48 (1.40)                       | 1.96 (0.89)                             | 1.53 (0.99)                         |
| No                               | 27  | 4.00 (0.48)          | 6.36 (0.71)                             | 3.62 (1.28)                       | 1.96 (1.06)                             | 1.59 (1.01)                         |
| P value                          |     | <b>&lt; 0.01</b>     | <b>0.02</b>                             | <b>&lt; 0.01</b>                  | <b>&lt; 0.01</b>                        | <b>&lt; 0.01</b>                    |
| <b>Trans friends/family</b>      |     |                      |                                         |                                   |                                         |                                     |
| Yes                              | 17  | 4.74 (0.89)          | 6.46 (0.87)                             | 4.65 (1.27)                       | 3.08 (1.51)                             | 3.00 (1.87)                         |
| Probably                         | 11  | 4.44 (0.76)          | 6.57 (0.36)                             | 4.32 (1.79)                       | 2.53 (1.24)                             | 2.00 (1.41)                         |
| Probably not                     | 149 | 4.10 (0.69)          | 6.33 (0.78)                             | 3.60 (1.51)                       | 2.34 (1.17)                             | 1.67 (1.15)                         |
| No                               | 116 | 3.95 (0.63)          | 6.11 (0.95)                             | 3.65 (1.30)                       | 2.10 (0.96)                             | 1.57 (1.08)                         |
| P value                          |     | <b>&lt; 0.01</b>     | <b>0.01</b>                             | 0.10                              | <b>0.02</b>                             | <b>&lt; 0.01</b>                    |
| <b>Trans coworker</b>            |     |                      |                                         |                                   |                                         |                                     |
| Yes                              | 32  | 4.37 (0.73)          | 6.18 (1.07)                             | 4.05 (1.22)                       | 3.06 (1.01)                             | 1.95 (1.40)                         |
| Probably                         | 23  | 4.30 (0.86)          | 6.34 (0.87)                             | 4.12 (1.56)                       | 2.57 (1.45)                             | 1.89 (1.45)                         |
| Probably not                     | 171 | 4.02 (0.72)          | 6.23 (0.88)                             | 3.57 (1.51)                       | 2.21 (1.11)                             | 1.74 (1.23)                         |
| No                               | 67  | 4.05 (0.54)          | 6.36 (0.66)                             | 3.74 (1.30)                       | 2.07 (0.99)                             | 1.52 (1.02)                         |
| P value                          |     | 0.06                 | 0.99                                    | 0.22                              | <b>&lt; 0.01</b>                        | 0.10                                |

Note. LGBT-DOCSS-JP total scale scores and subscale scores are described. All statistical tests used the Jonckheere–Terpstra test. Bold font shows significance at  $P < 0.05$  in P value line. SD, standard deviation.
